# Supplementary material for: A (H2O)4/crown ether network spanned between organometallic complex metal fragments
Source: Royal Society of Chemistry journal article supplement (doi:10.1039/b407475k), 2004-01-01

## Electronic Supplementary Information

### Experimental evidence supporting identification of 1

|                                                               |                                                                                                                                                                                                                                                                                                                                                                                                                                                                                                                                                    |
|---------------------------------------------------------------|----------------------------------------------------------------------------------------------------------------------------------------------------------------------------------------------------------------------------------------------------------------------------------------------------------------------------------------------------------------------------------------------------------------------------------------------------------------------------------------------------------------------------------------------------|
| Appearance                                                    | red solid                                                                                                                                                                                                                                                                                                                                                                                                                                                                                                                                          |
| Yield                                                         | 75%                                                                                                                                                                                                                                                                                                                                                                                                                                                                                                                                                |
| Formula                                                       | $C_{23}H_{29}ClMoN_2O_2$                                                                                                                                                                                                                                                                                                                                                                                                                                                                                                                           |
| Molecular Mass                                                | 496.88 g/mol                                                                                                                                                                                                                                                                                                                                                                                                                                                                                                                                       |
| EA (%)                                                        | calc.: C 55.60; H 5.88; N 5.64; Cl 7.14<br>found: C 55.25; H 5.90; N 5.49; Cl 7.40                                                                                                                                                                                                                                                                                                                                                                                                                                                                 |
| MS (FAB <sub>pos</sub> ) m/z [Frag.]                          | 958 (7%) [ $M^+ + 3 \text{ NBA}$ ], 498 (7%) [ $M^+$ ], 464 (26%) [ $M^+ - Cl$ ], 443 (100%) [ $M^+ - t\text{Bu}$ ]                                                                                                                                                                                                                                                                                                                                                                                                                                |
| IR (KBr) [ $\text{cm}^{-1}$ ]                                 | 2965 (m), 1938 (vs), 1849 (vs), 1612 (m), 1483 (m), 1409 (m), 1254 (w), 843 (w), 801 (m), 604 (w), 567 (m), 465 (m)                                                                                                                                                                                                                                                                                                                                                                                                                                |
| $^{13}\text{C}\{^1\text{H}\}$ -NMR ( $\text{CDCl}_3$ )(30°C): | 226.33 (s, 2 C, CO), 226.16 (s, 2 C, CO), 163.26 (s, 2 C, $C^{2,2'}$ ), 163.23 (s, 2 C, $C^{2,2'}$ ), 153.96 (s, 2 C, $C^{4,4'}$ ), 153.60 (s, 2 C, $C^{4,4'}$ ), 152.22 (s, 2 C, $C^{6,6'}$ ), 151.53 (s, 2 C, $C^{6,6'}$ ), 124.02 (s, 2 C, $C^{5,5'}$ ), 123.73 (s, 2 C, $C^{5,5'}$ ), 119.26 (s, 2 C, $C^{3,3'}$ ), 119.02 (s, 2 C, $C^{3,3'}$ ), 73.13 (s, 1 C, $C_m$ ), 71.18 (s, 1 C, $C_m$ ), 68.37 (s, 2 C, $C_t$ ), 53.92 (s, 2 C, $C_t$ ), 35.79 (s, 2 C, $C_{iso-Bu}$ ), 35.77 (s, 2 C, $C_{iso-Bu}$ ), 30.77 (br, 12 C, $C_{t-Bu}$ ). |

| Temperature (°C)                                                                                   | <b>30</b>                                                                                           | <b>-60</b>                                          |                                                                                         |  |
|----------------------------------------------------------------------------------------------------|-----------------------------------------------------------------------------------------------------|-----------------------------------------------------|-----------------------------------------------------------------------------------------|--|
| 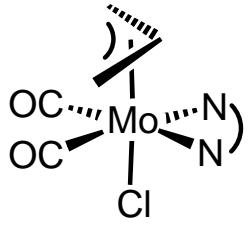 <p><b>A</b></p>  | H <sub>t-Bu</sub>                                                                                   | 1.44 (s)                                            | 1.44 (s)                                                                                |  |
|                                                                                                    | H <sub>a</sub>                                                                                      | superposed by H <sub>t-Bu</sub>                     | superposed by H <sub>t-Bu</sub>                                                         |  |
|                                                                                                    | H <sub>m</sub>                                                                                      | 3.03 (br)                                           | 3.03 (br)                                                                               |  |
|                                                                                                    | H <sub>s</sub>                                                                                      | 3.03 (br)                                           | 3.03 (br)                                                                               |  |
|                                                                                                    | H <sup>5,5'</sup>                                                                                   | 7.47 (d)<br><sup>3</sup> J <sub>H-H</sub> = 5.00 Hz | 7.47 (d)<br><sup>3</sup> J <sub>H-H</sub> = 5.00 Hz                                     |  |
|                                                                                                    | H <sup>3,3'</sup>                                                                                   | 8.02 (s)                                            | 8.02 (s)                                                                                |  |
|                                                                                                    | H <sup>6,6'</sup>                                                                                   | 8.78 (d)<br><sup>3</sup> J <sub>H-H</sub> = 5.80 Hz | 8.78 (d)<br><sup>3</sup> J <sub>H-H</sub> = 5.80 Hz                                     |  |
|  <p><b>B</b></p> | H <sub>t-Bu</sub>                                                                                   | 1.46 (s)                                            | 1.46 (br)                                                                               |  |
|                                                                                                    | H <sub>a</sub>                                                                                      | superposed by H <sub>t-Bu</sub>                     | superposed by H <sub>t-Bu</sub><br>1.68 (br)<br><sup>3</sup> J <sub>H-H</sub> = 9.22 Hz |  |
|                                                                                                    | H <sub>m</sub>                                                                                      | 3.83 (m)                                            | 3.83 (m)                                                                                |  |
|                                                                                                    | H <sub>s</sub>                                                                                      | 3.65 (d)<br><sup>3</sup> J <sub>H-H</sub> = 6.49 Hz | 3.19 (br)<br>4.08 (br)                                                                  |  |
|                                                                                                    | H <sup>5,5'</sup>                                                                                   | 7.59 (d)<br><sup>3</sup> J <sub>H-H</sub> = 5.00 Hz | 7.70 (br)<br>7.55 (sh)                                                                  |  |
|                                                                                                    | H <sup>3,3'</sup>                                                                                   | 8.07 (s)                                            | 8.08 (br)<br>8.04 (sh)                                                                  |  |
|                                                                                                    | H <sup>6,6'</sup>                                                                                   | 9.00 (d)<br><sup>3</sup> J <sub>H-H</sub> = 5.40 Hz | 8.28 (br)<br>9.67 (br)<br><sup>3</sup> J <sub>H-H</sub> = 3.41 Hz                       |  |
|                                                                                                    |  <p><b>C</b></p> |                                                     |                                                                                         |  |
|                                                                                                    |                                                                                                     |                                                     |                                                                                         |  |
|                                                                                                    |                                                                                                     |                                                     |                                                                                         |  |

## Experimental evidence supporting identification of **2**

|                                                                                     |                                                                                                                                                                                                                                                                                                                                                                   |
|-------------------------------------------------------------------------------------|-------------------------------------------------------------------------------------------------------------------------------------------------------------------------------------------------------------------------------------------------------------------------------------------------------------------------------------------------------------------|
| Appearance                                                                          | red solid                                                                                                                                                                                                                                                                                                                                                         |
| Yield                                                                               | 44%                                                                                                                                                                                                                                                                                                                                                               |
| Formula                                                                             | $C_{72}H_{114}F_6Mo_2N_4O_{26}S_2$                                                                                                                                                                                                                                                                                                                                |
| Molecular Mass                                                                      | 1821.69 g/mol                                                                                                                                                                                                                                                                                                                                                     |
| EA (%)                                                                              | calc.: C 47.47; H 6.31; N 3.08<br>found: C 48.01; H 6.48; N 3.04                                                                                                                                                                                                                                                                                                  |
| MS (FAB <sub>pos</sub> ) m/z [Frag.]                                                | 942 (6%) [ $\{Mo( {}^3-C_3H_5)(CO)_2(bipy^*)\}_2H_2O\}^+$ ], 463 (42%) [ $\{Mo( {}^3-C_3H_5)(CO)_2(bipy^*)\}^+$ ], 422 (31%) [ $\{Mo(CO)_2(bipy^*)\}^+$ ], 405 (38%) [ $\{Mo( {}^3-C_3H_5)(bipy^*)\}^+$ ], 392 (17%) [ $\{Mo(CO)(bipy^*)\}^+$ ], 362 (7%) [ $\{Mo(bipy^*)\}^+$ ]                                                                                  |
| IR (KBr) [ $cm^{-1}$ ]                                                              | 3423 (m,br), 2955 (w), 2897 (w), 1944 (vs), 1854 (vs), 1615 (s), 1545 (m), 1474 (m), 1410 (m), 1553 (m), 1262 (vs), 1158 (m), 1103 (m), 1026 (s), 953 (m), 843 (m), 801 (m), 752 (m), 637 (vs), 567 (m), 509 (m)                                                                                                                                                  |
| $^1H$ -NMR (CDCl <sub>3</sub> )                                                     | 9.07 (d, ${}^3J_{H-H} = 5.12$ Hz, 4 H, $\underline{H}^{6,6'}$ ), 8.05 (s, 4 H, $\underline{H}^{3,3'}$ ), 7.65 (d, ${}^3J_{H-H} = 5.12$ Hz, 4 H, $\underline{H}^{5,5'}$ ), 4.04 (m, 2 H, $\underline{H}_m$ ), 3.69 (br, 52 H, $\underline{H}_s$ + 18-crown-6), 1.57 (d, ${}^3J_{H-H} = 7.85$ Hz, 4 H, $\underline{H}_a$ ), 1.46 (s, 36 H, $\underline{H}_{t-Bu}$ ) |
| $^{13}C\{^1H\}$ -NMR (CDCl <sub>3</sub> )                                           | 225.97 (s, 4 C, CO), 164.79 (s, 4 C, $C^{2,2'}$ ), 154.14 (s, 4 C, $C^{4,4'}$ ), 152.16 (s, 4 C, $C^{6,6'}$ ), 124.30 (s, 4 C, $C^{5,5'}$ ), 119.18 (s, 4 C, $C^{3,3'}$ ), 73.89 (s, 2 C, $C_m$ ), 71.02 (s, 24 C, 18-crown-6), 61.00 (s, 4 C, $C_t$ ), 36.00 (s, 4 C, $C_{iso-Bu}$ ), 30.71 (s, 12 C, $C_{Me}$ )                                                 |
| 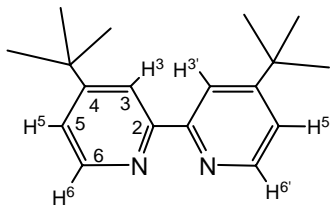 |                                                                                                                                                                                                                                                                                                                                                                   |

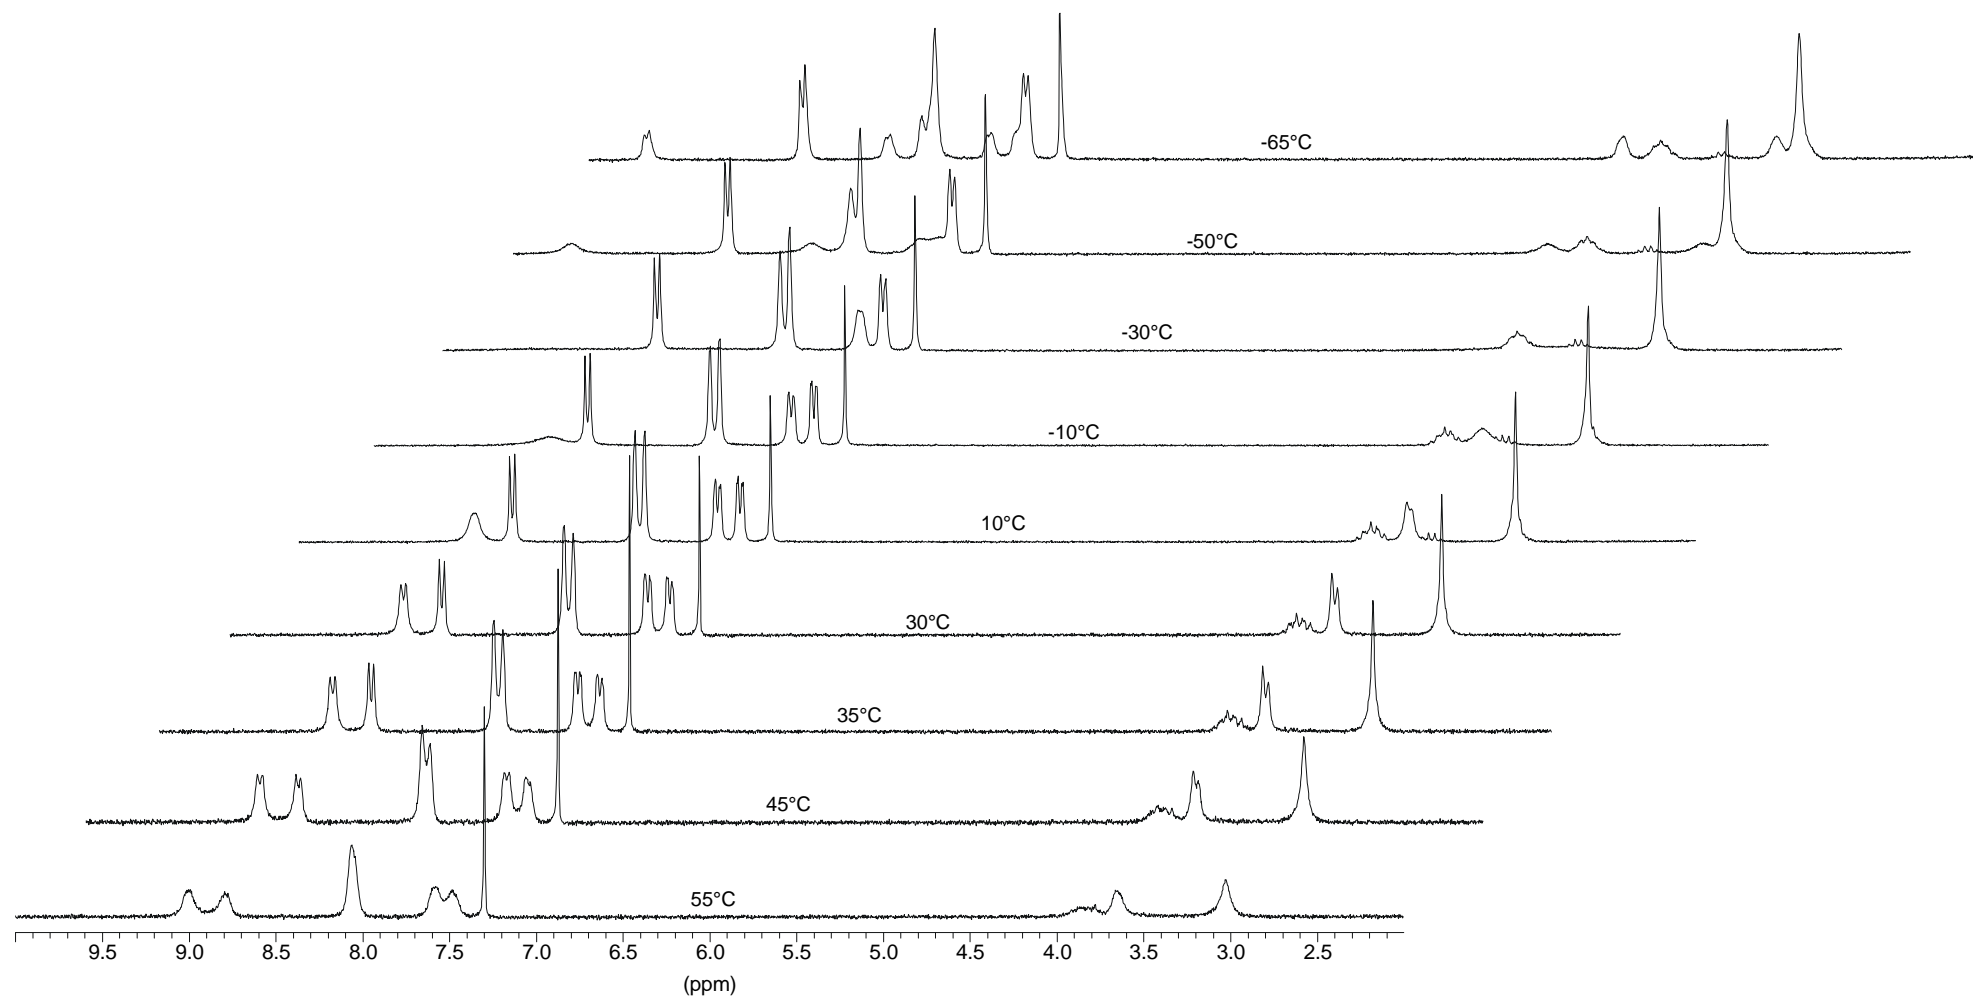

$^1\text{H-NMR}$  in  $\text{CDCl}_3$

Temperature dependent  $^1\text{H-NMR}$  spectrum (200.13 MHz) of **1** in  $\text{CDCl}_3$

Temperature dependent  $^1\text{H}$ -NMR spectrum (200.13 MHz) of **1** in  $\text{CD}_2\text{Cl}_2$

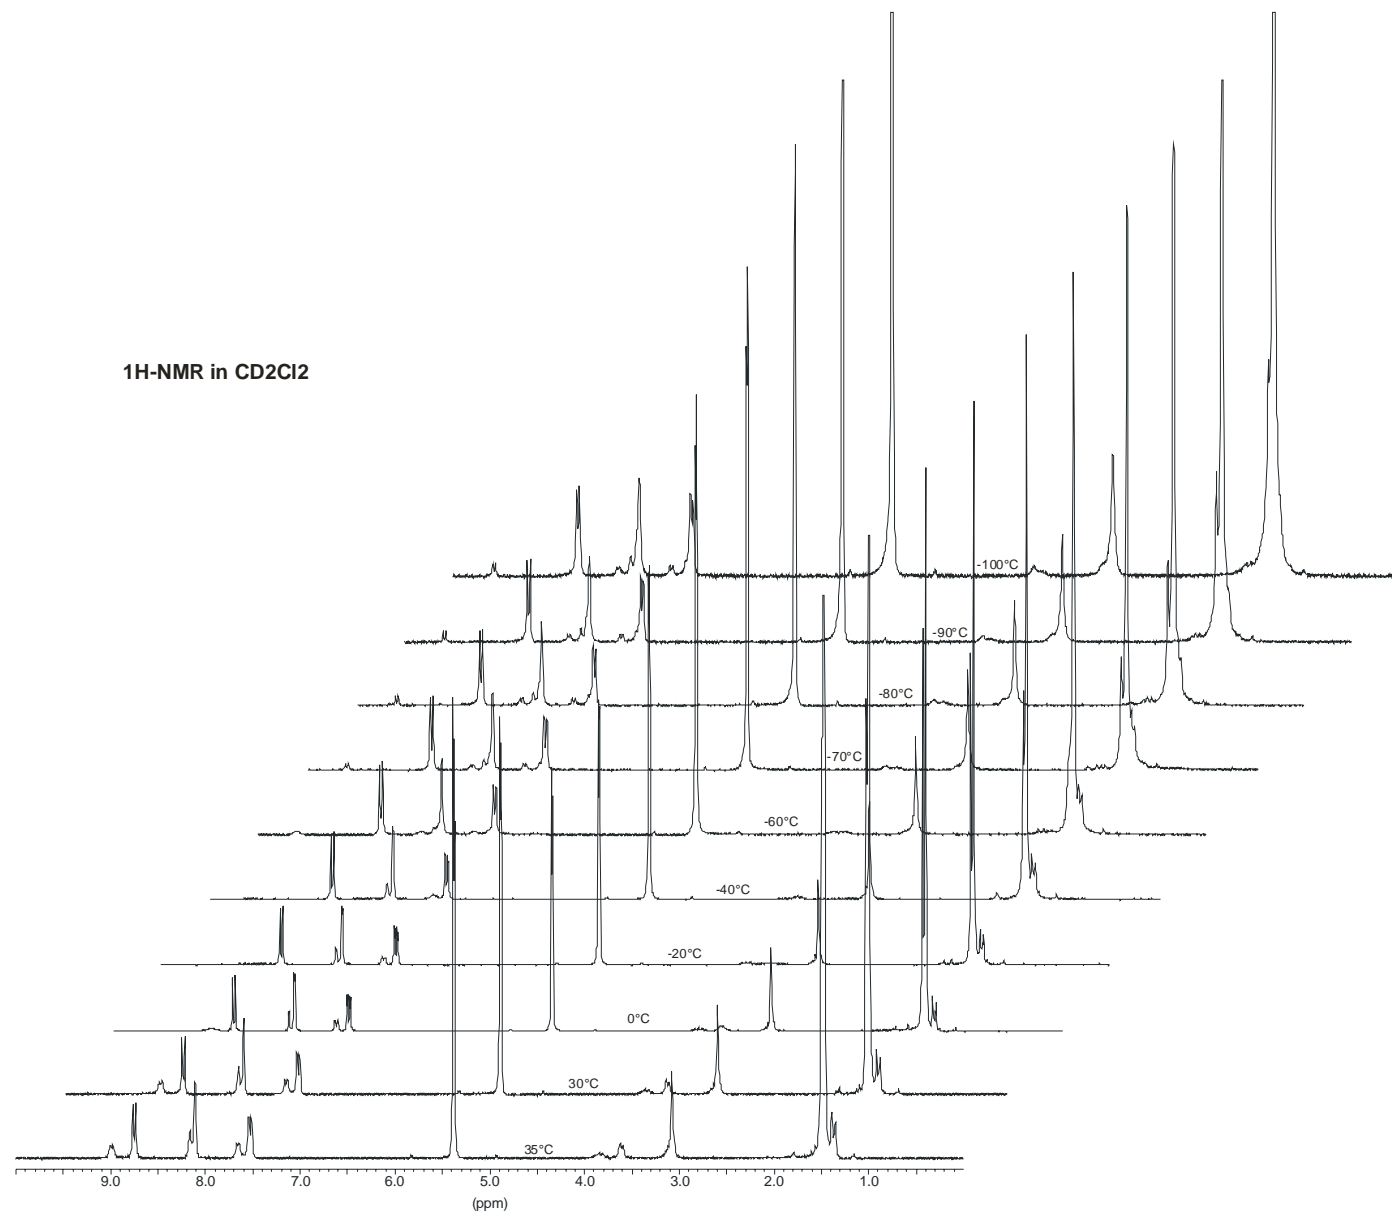

Supplement: b407475k.pdf [file b407475k.pdf]
